# Supplementary material for: LeNup: learning nucleosome positioning from DNA sequences with improved convolutional neural networks
Source: Oxford University Press journal article supplement (doi:10.1093/bioinformatics/bty003), 2018-01-09
Supplement: bioinformatics_34_10_1705_s1.zip [file bioinformatics_34_10_1705_s1.zip]

Table S2: Compare the LeNup predictions with the MNase-seg results

| Threshold | number of nucleosome | number of nucleosome | ratio  |
|-----------|----------------------|----------------------|--------|
|           | MNase-seg            | LeNup prediction     |        |
| 2         | 143196               | 109930               | 0.7677 |
| 5         | 119857               | 99107                | 0.8269 |
| 10        | 67569                | 61730                | 0.9136 |
| 15        | 28706                | 27467                | 0.9568 |
| 20        | 11209                | 10794                | 0.9630 |
| 25        | 3807                 | 3744                 | 0.9835 |
| 30        | 1375                 | 1362                 | 0.9905 |
