# Supplementary material for: LeNup: learning nucleosome positioning from DNA sequences with improved convolutional neural networks
Source: Oxford University Press journal article supplement (doi:10.1093/bioinformatics/bty003), 2018-01-09
Supplement: bioinformatics_34_10_1705_s1.zip [file bioinformatics_34_10_1705_s1.zip]

Table S1: Effect of data random partitioning

| Species        | $\text{VAR}(S_n)$     | $\text{VAR}(S_p)$     | $\text{VAR}(\text{ACC})$ | $\text{VAR}(\text{MCC})$ |
|----------------|-----------------------|-----------------------|--------------------------|--------------------------|
| H.sapiens      | $1.85 \times 10^{-5}$ | $3.47 \times 10^{-5}$ | $1.92 \times 10^{-6}$    | $5.42 \times 10^{-6}$    |
| C.elegans      | $4.14 \times 10^{-5}$ | $2.19 \times 10^{-5}$ | $1.58 \times 10^{-6}$    | $5.44 \times 10^{-6}$    |
| D.melanogaster | $1.76 \times 10^{-5}$ | $1.03 \times 10^{-5}$ | $6.8 \times 10^{-7}$     | $2.35 \times 10^{-6}$    |
