# Supplementary figures and images for: LeNup: learning nucleosome positioning from DNA sequences with improved convolutional neural networks
Source: Oxford University Press journal article supplement (doi:10.1093/bioinformatics/bty003), 2018-01-09

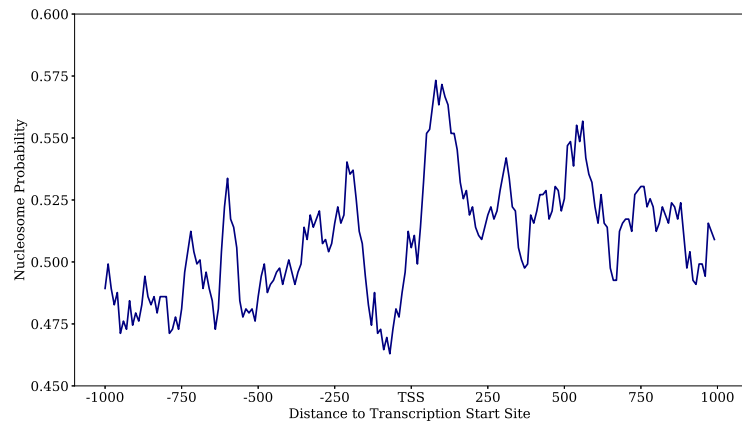

Figure S1: Average distribution profile of nucleosome near the TSSs of human chr20 genes.

Supplement: bioinformatics_34_10_1705_s1.zip [file bioinformatics_34_10_1705_s1.zip]
